# Supplementary material for: A near-infrared spectroscopy routine for unambiguous identification of cryptic ant species
Source: PubMed Central journal article supplement (PMC4699785; doi:10.7717/peerj.991), 2015-09-15

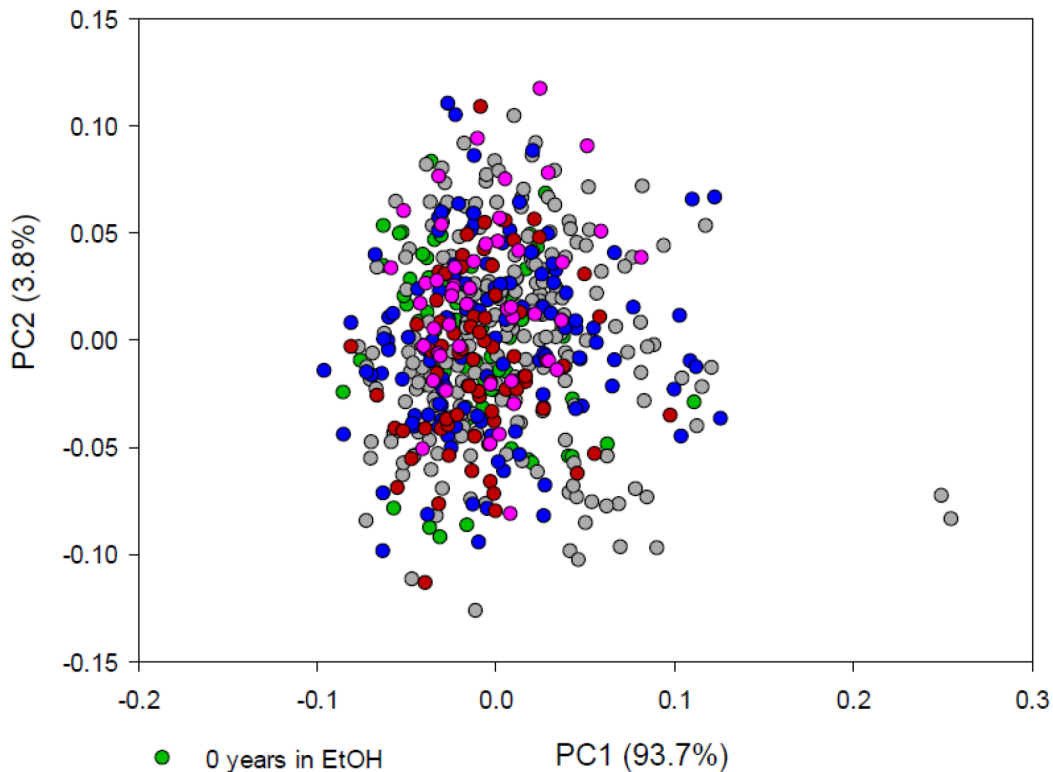

Supplement: peerj-03-991-s005.pdf [file peerj-03-991-s005.pdf]
